# Supplementary material for: Uncovering a unique pathogenic mechanism of SARS-CoV-2 omicron variant: selective induction of cellular senescence
Source: publisher site journal article supplement (doi:10.18632/aging.205297), 2023-12-12
Supplement: Supplementary file [file aging-v15i23-205297-supplementary-material-SD1.pdf]

## SUPPLEMENTARY FIGURES

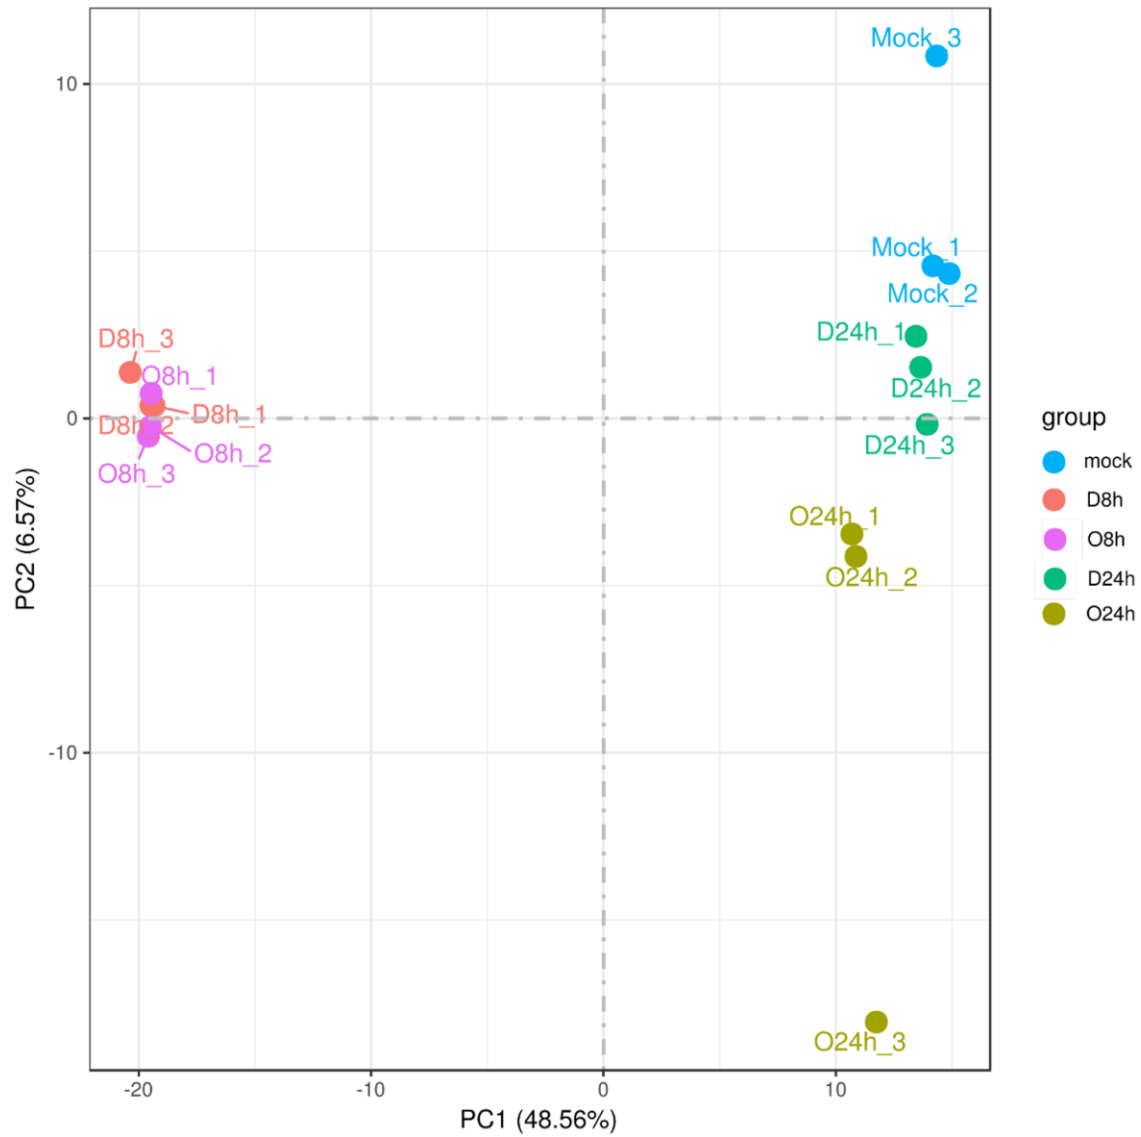

Supplementary Figure 1. Principal component analysis (PCA) shows discrete clusters undergoing different infections conditions of SAECs with omicron (O) or delta (D) infection for 8 h or 24 h and without (mock) infection.

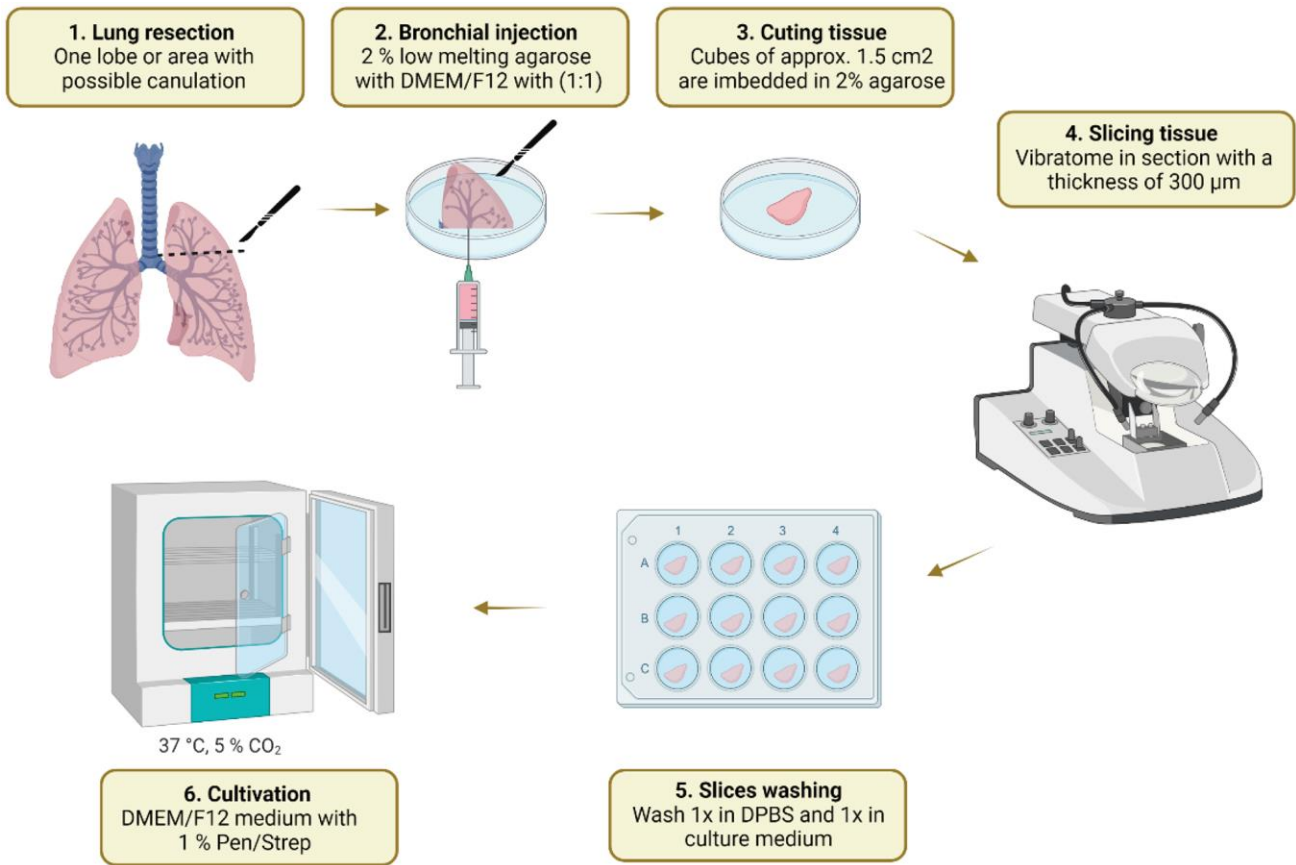

Supplementary Figure 2. Schematic overview of the experimental setup for the infection of human PCLSs, created with <https://www.biorender.com/>. After explanation of the lungs, agarose was injected into the bronchial system and cut into slices.
