# Supplementary material for: Uncovering a unique pathogenic mechanism of SARS-CoV-2 omicron variant: selective induction of cellular senescence
Source: publisher site journal article supplement (doi:10.18632/aging.205297), 2023-12-12
Supplement: Supplementary file [file aging-v15i23-205297-supplementary-material-SD2.pdf]

## SUPPLEMENTARY TABLES

**Supplementary Table 1. Clinical characteristics of deceased patients infected with SARS-CoV-2 delta or omicron variant.**

| <b>Patient</b> | <b>Age</b> | <b>Sex</b> | <b>SARS-CoV-2 variant</b> | <b>Cause of Death</b> |
|----------------|------------|------------|---------------------------|-----------------------|
| 1              | 78         | male       | delta                     | mutiple organ failure |
| 2              | 54         | male       | delta                     | lung failure          |
| 3              | 64         | male       | delta                     | lung failure          |
| 4              | 63         | male       | omicron                   | paralytic ileus       |
| 5              | 64         | male       | omicron                   | mesenteric ischemia   |
| 6              | 35         | female     | omicron                   | cardiomyopathy        |

**Supplementary Table 2. Overview of primer sets used for qRT-PCR (95°C for 10 min, followed by 45 cycles of 95°C for 10 s, 60°C for 20 s, and 72°C for 30 s) produced by metabion international AG (Planegg/Steinkirchen Germany).**

| <b>Sequence name</b> | <b>Sequence</b>        |
|----------------------|------------------------|
| ACTB.FI              | CATGTACGTTGCTATCCAGGC  |
| ACTB.RI              | CTCCTTAATGTCACGCACGAT  |
| CDKN2A (p16)_F       | CTCGTGCTGATGCTACTGAGGA |
| CDKN2A (p16)_R       | GGTCGGCGCAGTTGGGCTCC   |
| CDKN1A(p21)_F        | TCACTGTCTTGTACCCTTGTGC |
| CDKN1A(p21)_R        | GGCGTTTGGAGTGGTAGAAA   |
| LMNB1_F              | TTGGATGCTCTTGGGGTTC    |
| LMNB1_R              | AAGCAGCTGGAGTGGTTGTT   |
